# Supplementary material for: Retrieval of tropospheric column densities of NO 2 from combined SCIAMACHY nadir/limb measurements
Source: Copernicus journal article supplement (doi:10.5194/amt-3-283-2010), 2010-02-25
Supplement: Supplementary file 1 [file amt-3-283-2010-supplement.pdf]

## Retrieval of tropospheric column densities of NO<sub>2</sub> from combined SCIAMACHY nadir/limb measurements: Supplementary material

S. Beirle<sup>1</sup>, S. Kühl<sup>1</sup>, J. Puķīte<sup>1</sup>, and T. Wagner<sup>1</sup>

<sup>1</sup>Max-Planck-Institut für Chemie, Mainz, Germany

### Abstract.

This document provides supplementary material to the manuscript **Retrieval of tropospheric column densities of NO<sub>2</sub> from combined SCIAMACHY nadir/limb measurements** (Beirle et al., 2010, hereafter BE10).

### 1 Content

This document provides supplementary material to the manuscript Beirle et al., 2010, hereafter BE10.

Figures, Equations and Sections in BE10 are referenced by a prefix M (Manuscript), Figures, Equations and Sections in this supplement are referenced by a prefix S (Supplement).

See Table 1 in BE10 for an overview for abbreviations and symbols.

In addition to the Figures in BE10, the following Figures are provided:

- Fig. S1 displays  $V_{RS}^*$ , i.e. the mean NO<sub>2</sub> VCD  $V^*$  in the reference sector as function of day  $d$  and latitude  $\Lambda$ . See Section M2.4.1.
- Fig. S2 shows the error  $\widehat{\delta W}_{RSM}$  as function of day  $d$  and latitude  $\Lambda$ . See Section S3.2 and Eq. S1.
- Fig. S3 shows the error  $\widehat{\delta W}_{RLC}$  as function of day  $d$  and latitude  $\Lambda$ . See Section S3.3 and Eq. S2.
- Figs. S4-S9 display maps of daily  $V^*$ ,  $L$ ,  $\Delta L$ , and the TSCDs  $T_{RSM}$ ,  $T_{ALC}$ , and  $T_{RLC}$ , for additional days (April 2, 2005; July 20, 2005; October 24, 2005).
- Figs. S10 shows the latitudinal dependencies of  $V_{RS}^*$  and  $L_{RS}$  for the respective days.

- Figs. S11-16 show monthly climatologies of  $T_{RSM}$ ,  $T_{ALC}$ , and  $T_{RLC}$ , their differences, and the difference in standard deviations, for April, July, and October 2003-2008.

### 2 Stratospheric VCD $W_{RSM}$

Fig. S1 displays  $V_{RS}^*$ , i.e. the mean NO<sub>2</sub> VCD  $V^*$  in the reference sector, as function of day  $d$  and latitude  $\Lambda$ . This is the stratospheric VCD estimate  $W_{RSM}$ , as defined in Eq. M1. See Section M2.4.1.

### 3 Intrinsic error information

Rough estimates of the accuracy of TSCDs can be gained from - unphysical - negative TSCDs (Section S3.1). Two additional error quantities are defined:  $\delta W_{RSM}$  as the standard deviation of  $W$  in the reference sector (3.2) and  $\delta W_{RLC}$  as the mean quadratic deviation of individual LLV values  $\Delta L$  from the smoothed LUT  $\widehat{\Delta L}$  (3.3). Note that  $\delta W_{RSM}$  and  $\delta W_{RLC}$  are not meant to be the “one and only” error of either SES, but rather contain information on statistical and systematic errors which are calculated automatically during the RSM and RLC retrieval procedures. Increased values of  $\delta W_{RSM}$  and  $\delta W_{RLC}$  indicate systematic errors due to non-validity of the underlying assumptions of the respective method. From the error in  $W$ , the according error in  $T$  is defined by multiplication with  $A_{Strat}$  (3.4). Both error quantities are calculated during the processing of TSCDs as function of day and latitude.

#### 3.1 Accuracy

Total (slant) column densities of nadir as well as limb measurements are potentially biased. Nadir SCDs are potentially

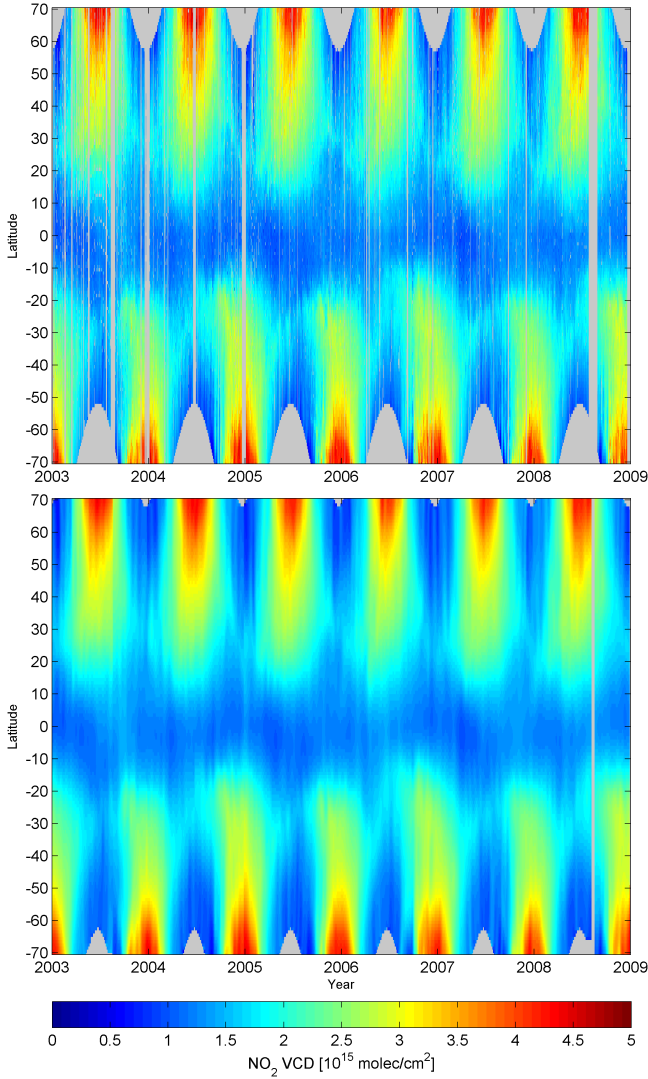

**Fig. S1.** Mean NO<sub>2</sub> VCD in the Reference Sector (RS) as function of day and latitude:  $V_{RS}^*(d, \Lambda)$  (top) and the smoothed LUT  $\widehat{V}_{RS}^*(d, \Lambda)$  (bottom).

affected by unknown spectral features introduced by the optical system and the necessity to measure the direct sun spectrum damped by a diffusor plate (Richter and Burrows, 2002; Wenig et al., 2004). This bias, as well as other systematic errors, generally may depend on time and latitude. However, all systematic error compounds that are the same in- and outside the RS are eliminated in the tropospheric excess CDs  $T_{RSM}$  and  $T_{RLC}$ .

The quantification of absolute biases, i.e. the estimation of the accuracy of total, stratospheric and thus tropospheric CDs, is difficult, and generally needs knowledge on the “truth”. However, the “truth” is known in so far, that negative tropospheric CDs are unphysical. I.e., from the appearance of systematic negative TSCDs (on a level beyond possible statistical fluctuations around zero), a lower estimate of the

local accuracy can be gained, and the removal/reduction of negative TSCDs is one central argument for the improvement of one SES compared to another.

In addition, spatial patterns of enhanced (or reduced) TSCDs far from source regions likely indicate artefacts introduced by a insufficient stratospheric correction, and allow the quantification of accuracies of the SES.

Finally, over unpolluted regions, the mean, but as well the standard deviation (over time) of tropospheric NO<sub>2</sub> CDs is expected to be low. If high standard deviations are observed, this indicates fluctuations of artefacts of the stratospheric estimation. Thus, the reduction of standard deviation is also a quantitative argument for the evaluation of the SES performance.

### 3.2 Standard deviation in the RS: $\delta W_{RSM}$

While averaging daily total VCDs  $V^*$  in  $1^\circ$  bins in the RS for the calculation of  $W_{RSM}$  (Eq. M3), we also calculate the respective standard deviation (std)  $s(V_{RS}^*)$ :

$$\delta W_{RSM}(d, \Lambda) := s(V_{RS}^*). \quad (1)$$

$\delta W_{RSM}$  is processed similar to  $V_{RS}^*$ , i.e. a LUT  $\widehat{\delta W}_{RSM}(d, \Lambda)$  is created and smoothed with the same settings as for  $\widehat{V}_{RS}^*$ . Fig. S2 displays  $\widehat{\delta W}_{RSM}(d, \Lambda)$ . Typical values are about  $2.5 \times 10^{14}$  molec/cm<sup>2</sup>.

As long as the basic assumptions of the RSM are justified, i.e. the RS being free of tropospheric pollution and stratospheric CDs being independent on longitude,  $\delta W_{RSM}$  is dominated by statistical errors (e.g. the DOAS fit noise and natural fluctuations of NO<sub>2</sub> VCDs). An increased value of  $\widehat{\delta W}_{RSM}$ , like at  $20^\circ$  S (Fig. S2), indicates additional systematic errors, probably due to fit artefacts over oligotrophic oceanic regions. Also stratospheric dynamics may affect the RS, especially at high latitudes, leading to increased values of  $\widehat{\delta W}_{RSM}$  up to  $5 \times 10^{14}$  molec/cm<sup>2</sup> at  $65^\circ$  S in October).

### 3.3 Error of the LLV: $\delta W_{RLC}$

The neglect of zonal variations in the simple RSM introduces systematic errors in the TSCDs as will be shown below. The LLC reduces these systematic errors significantly, but can not remove stratospheric patterns completely. One reason for this is the need of interpolation and smoothing of the limb VCDs (defined at the respective tangent points) over space and time. Errors thus inevitably occur in cases of strong (spatial as well as temporal) gradients. Such shortcomings of the smoothed field  $\widehat{\Delta L}$  are reflected by the mean quadratic deviation of the smoothed field  $\widehat{\Delta L}_i$  and the individual LLV  $\Delta L_i$ , where  $i$  is an index running over all considered limb states (including the previous and the following day) within a latitude bin of  $1^\circ$  resolution:

$$\delta W_{RLC}(d, \Lambda) := \sqrt{\sum_i (\Delta L_i(d, \Lambda, \Phi) - \widehat{\Delta L}(d, \Lambda, \Phi))^2}. \quad (2)$$

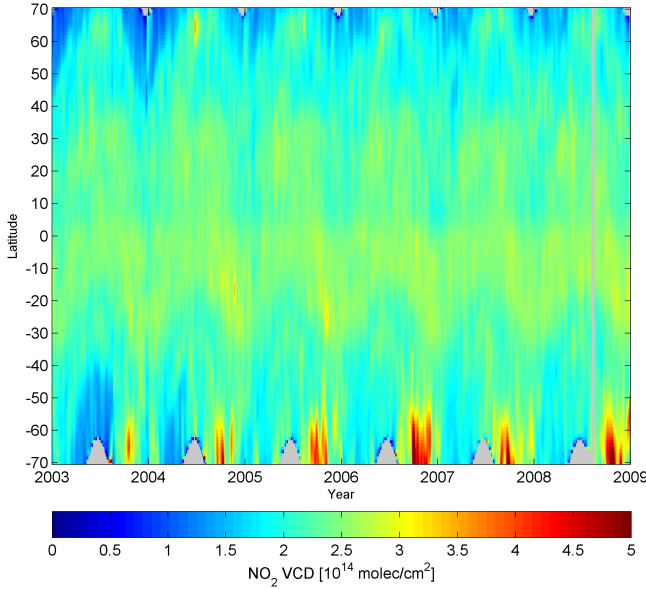

**Fig. S2.** Standard deviation of NO<sub>2</sub> VCDs in the RS  $\widehat{\delta W}_{\text{RSM}}(d, \Lambda)$  as function of day and latitude.

Whenever the smoothed LUT  $\widehat{\Delta L}$  is not capable of reflecting features of the measured LLV  $\Delta L$ , this results in an increased error  $\delta W_{\text{RLC}}$ . Again, we create a smoothed LUT  $\widehat{\delta W}_{\text{RLC}}(d, \Lambda)$ , which is shown in Fig. S3. High values of  $\widehat{\delta W}_{\text{RLC}}$  occur especially during autumn south from 60° S, as a consequence of strong spatial gradients of stratospheric NO<sub>2</sub> (see discussion).

From the difference  $\Delta L_i(d, \Lambda, \Phi) - \widehat{\Delta L}(d, \Lambda, \Phi)$ , in principle also a “state error” for individual states can be defined, which would retain the longitudinal dependency, which is lost in the definition of  $\delta W_{\text{RLC}}$ .

### 3.4 TSCD errors

From the errors in W, the respective errors in T are calculated by multiplication with the respective stratospheric AMF:

$$\delta T_{\text{RSM}} := \delta W_{\text{RSM}} \times A_{\text{Strat}} \quad (3)$$

$$\delta T_{\text{RLC}} := \delta W_{\text{RLC}} \times A_{\text{Strat}}. \quad (4)$$

$\delta T$  is thus higher than  $\delta W$  by  $A_{\text{Strat}}$ , i.e. a factor of 2-7.

## 4 Daily examples

In addition to the sample day presented in BE10 (28 January 2006), Figs. S4-S10 illustrate the different SES (Figs. S4, S6, S8, S10) and the resulting TSCDs (Figs. S5, S7, S9) for three additional days in April, July and October.

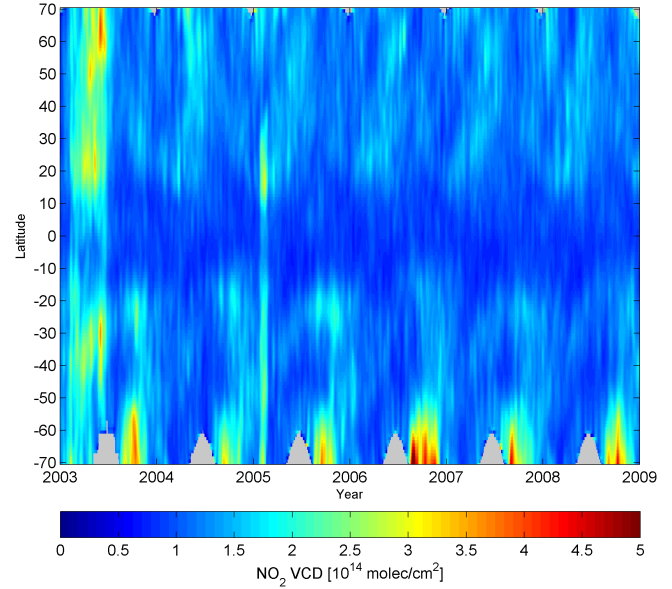

**Fig. S3.** Error of the LLV estimation  $\widehat{\delta W}_{\text{RLC}}(d, \Lambda)$ .

## 5 Monthly climatologies

Figs. 11-16 show monthly climatologies of TSCDs (Figs. S11, S13, S15) and their differences (Figs. S12, S14, S16) for April, July, and October. In contrast to BE10, only differences of RSM and RLC are shown, as the ALC introduces zonal stripes throughout the year due to the different latitudinal dependencies of  $L$  and  $V^*$  (compare Fig. S10).

## References

**BE10:** Beirle, S., S. Kühl, J. Pukite, and T. Wagner, Retrieval of tropospheric column densities of NO<sub>2</sub> from combined SCIAMACHY nadir/limb measurements, AMT, 2010.

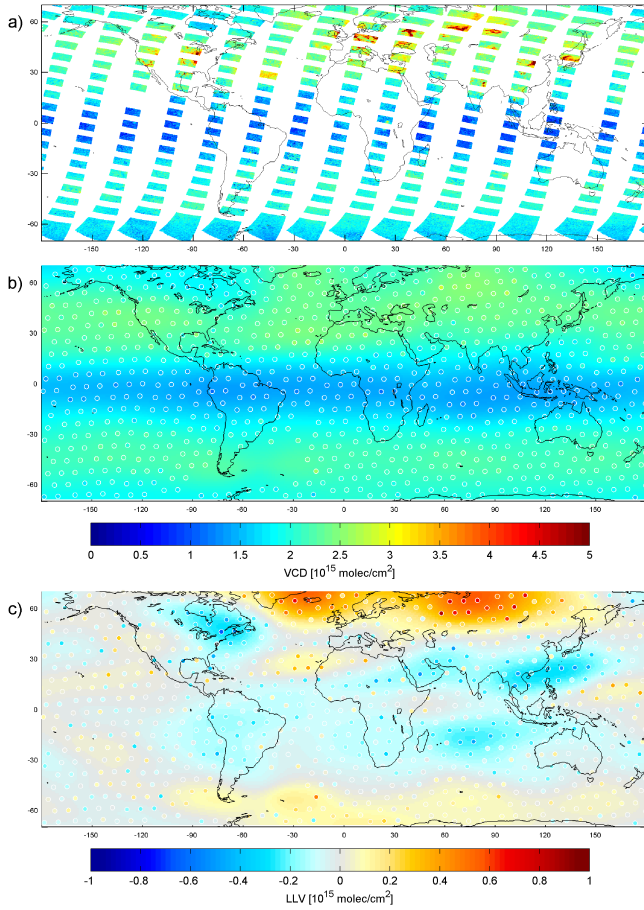

**Fig. S4.** Results for 2 April 2005. a) Total nadir VCD  $V^*$  b) Stratospheric limb VCD  $L$  c) Longitudinal Limb Variation  $\Delta L$ . Colour-coded disks in b) and c) indicate individual limb states (including the previous and following day), while the maps show the respective interpolated and smoothed fields.

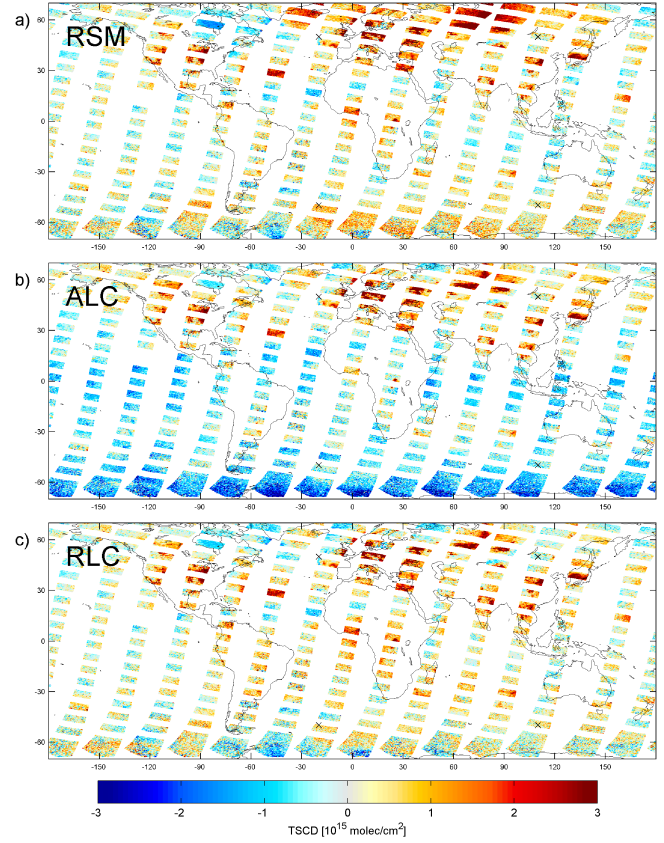

**Fig. S5.** Tropospheric SCDs for 2 April 2005.

- a)  $T_{\text{RSM}}$ : Reference Sector Method.
- b)  $T_{\text{ALC}}$ : Absolute Limb Correction.
- c)  $T_{\text{RLC}}$ : Relative Limb Correction.



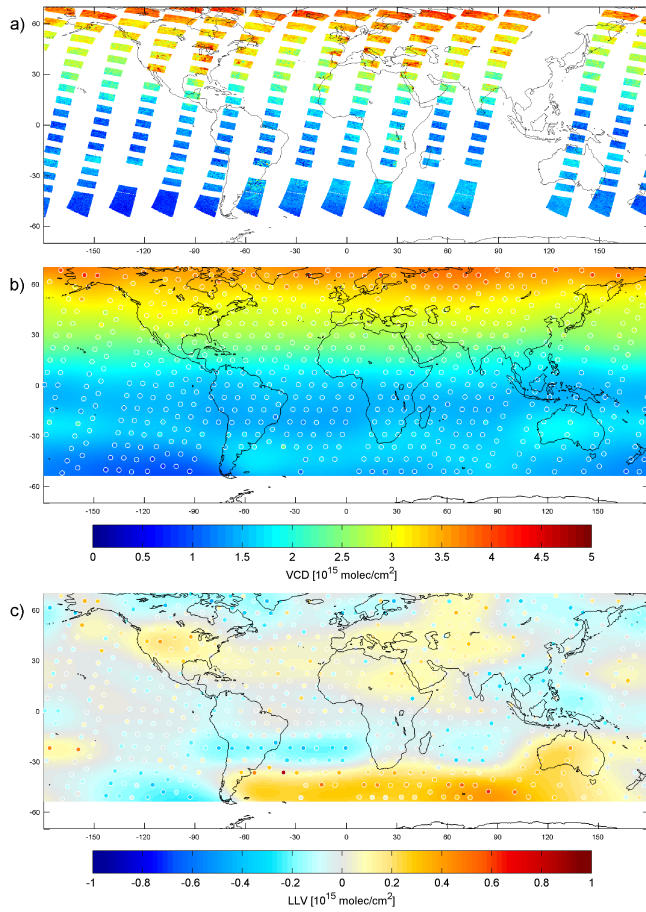

**Fig. S6.** Results for 20 July 2005. a) Total nadir VCD  $V^*$  b) Stratospheric limb VCD  $L$  c) Longitudinal Limb Variation  $\Delta L$ . Colour-coded disks in b) and c) indicate individual limb states (including the previous and following day), while the maps show the respective interpolated and smoothed fields.

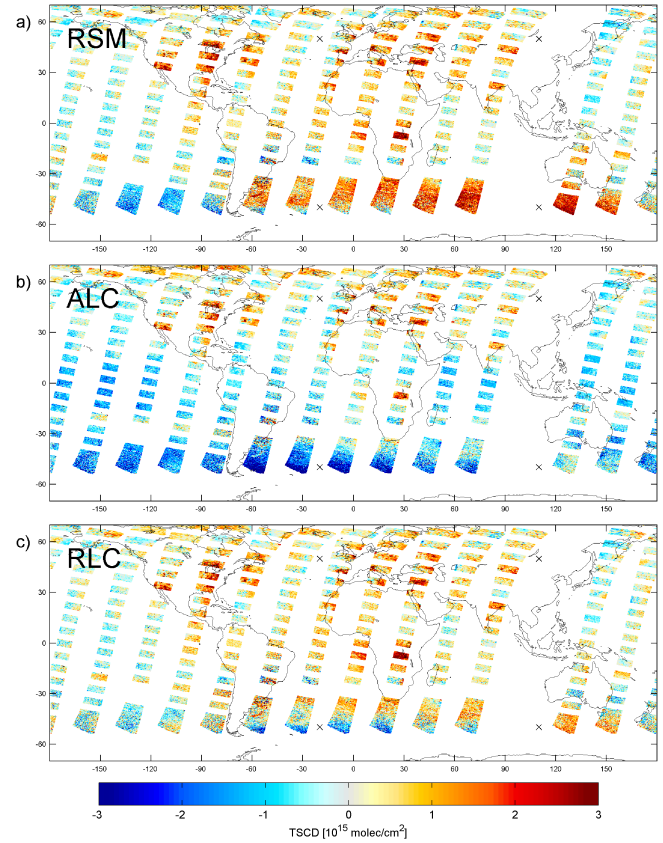

**Fig. S7.** Tropospheric SCDs for 20 July 2005.

- a)  $T_{RSM}$ : Reference Sector Method.
- b)  $T_{ALC}$ : Absolute Limb Correction.
- c)  $T_{RLC}$ : Relative Limb Correction.

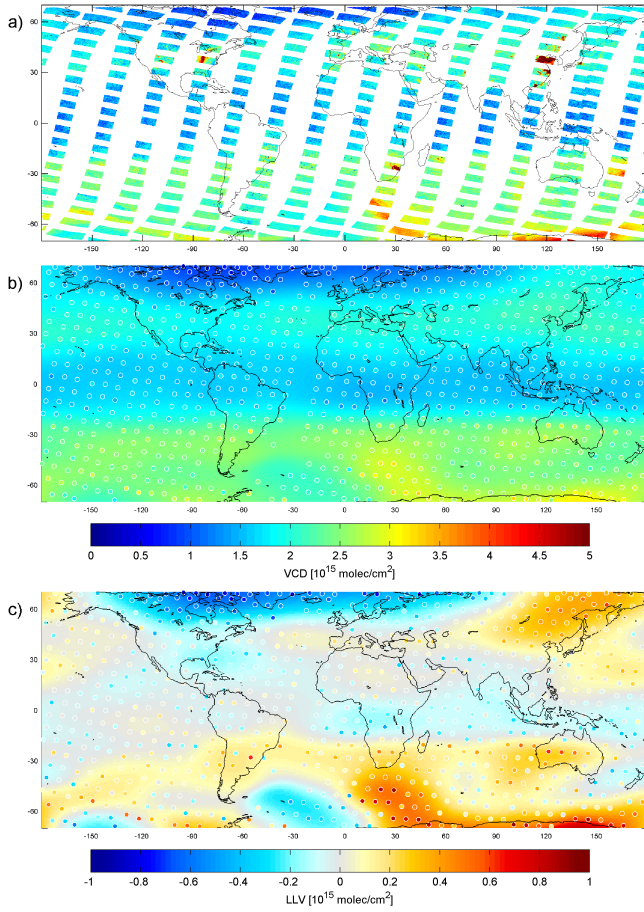

**Fig. S8.** Results for 24 October 2005. a) Total nadir VCD  $V^*$  b) Stratospheric limb VCD  $L$  c) Longitudinal Limb Variation  $\Delta L$ . Colour-coded disks in b) and c) indicate individual limb states (including the previous and following day), while the maps show the respective interpolated and smoothed fields.

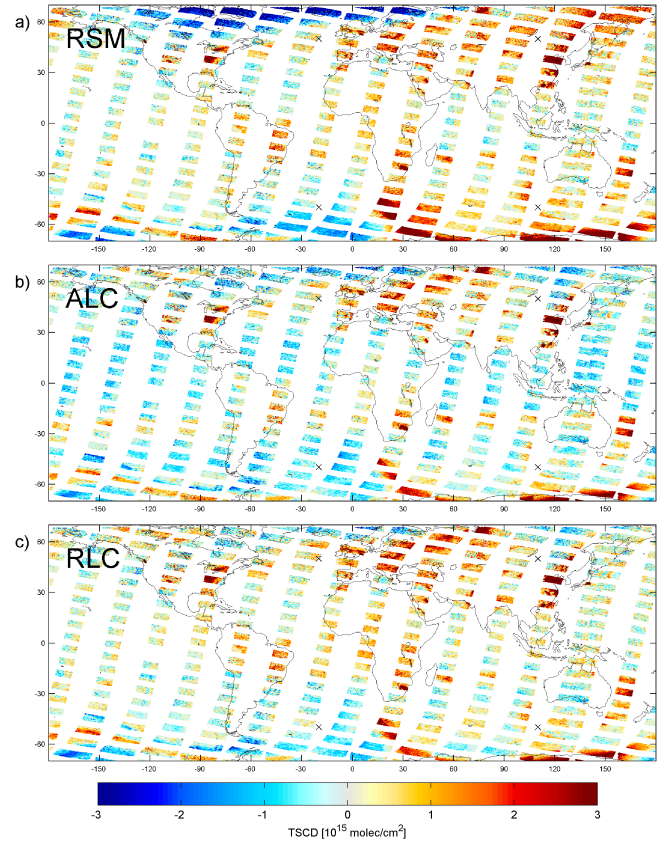

**Fig. S9.** Tropospheric SCDs for 24 October 2005.

- a)  $T_{\text{RSM}}$ : Reference Sector Method.
- b)  $T_{\text{ALC}}$ : Absolute Limb Correction.
- c)  $T_{\text{RLC}}$ : Relative Limb Correction.

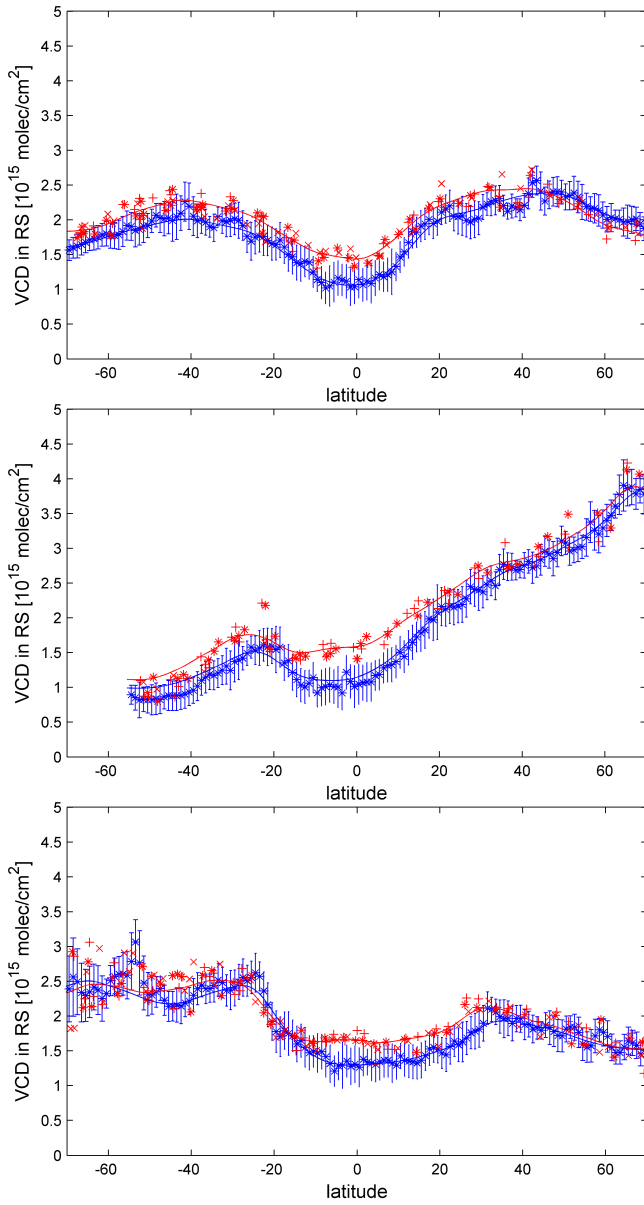

**Fig. S10.** Latitudinal dependencies of  $V_{RS}^*$  (blue) and  $L_{RS}$  (red) for 2 April 2005 (top), 20 July 2005 (middle), and 24 October 2005 (bottom).

Nadir measurements are binned in  $1^\circ$  bins and displayed as mean (\*) and standard deviation (bar). Limb measurements are displayed for the actual day (\*) as well as for the previous (+) and the following (x) day. The curves show the respective smoothed LUTs  $\hat{V}_{RS}^*$  and  $\hat{L}_{RS}$ .

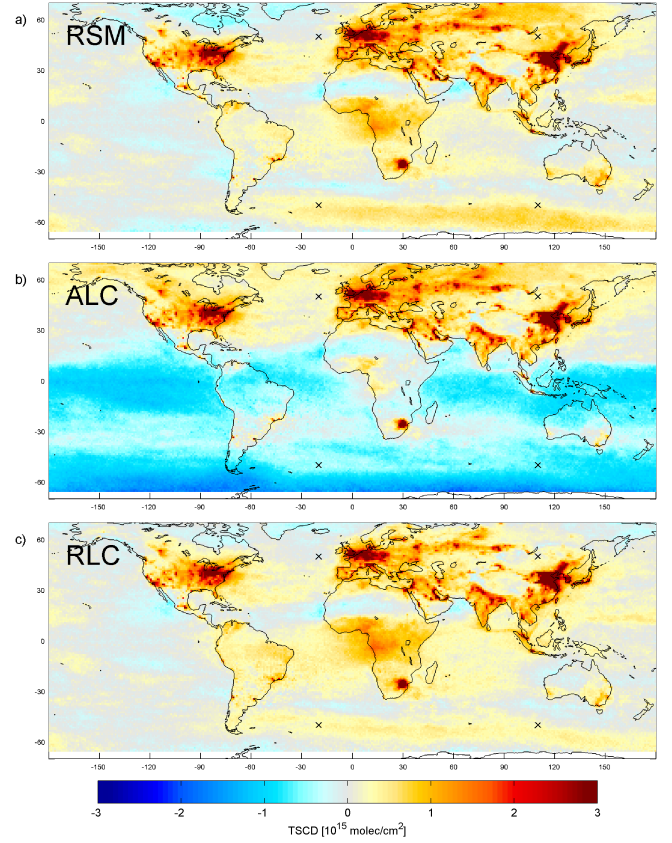

**Fig. S11.** Mean tropospheric SCDs for April 2003-2008. a)  $T_{RSM}$ : Reference Sector Method. b)  $T_{ALC}$ : Absolute Limb Correction. c)  $T_{RLC}$ : Relative Limb Correction.

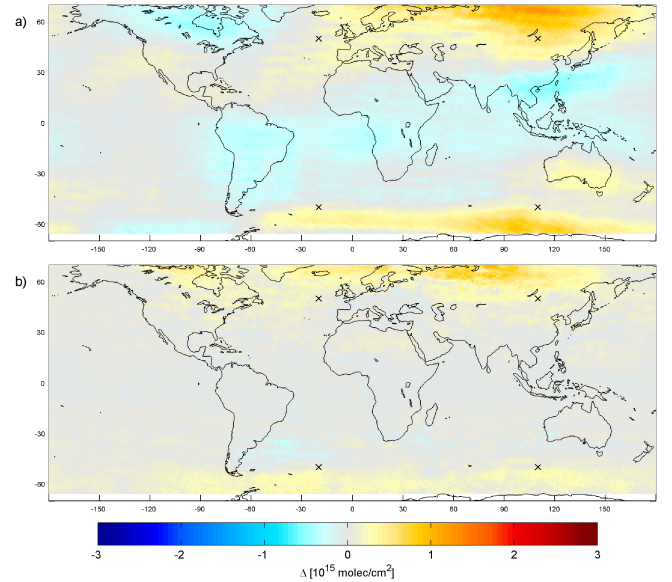

**Fig. S12.** Difference of RSM and RLC for April 2003-2008. a) Difference of mean tropospheric SCDs  $T_{RSM}-T_{RLC}$  b) Difference of standard deviations:  $s(T_{RSM})-s(T_{RLC})$ .



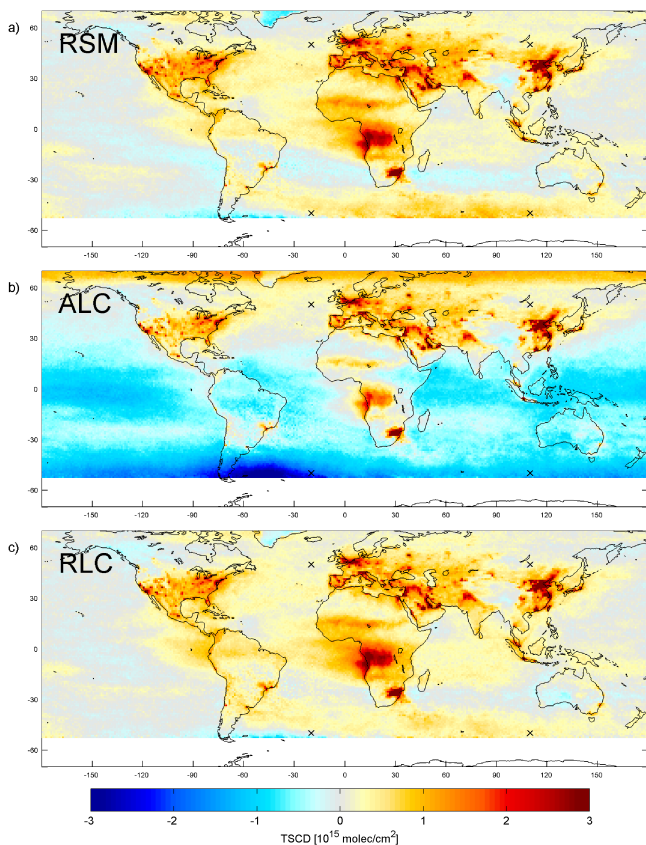

**Fig. S13.** Mean tropospheric SCDs for July 2003-2008. a)  $T_{\text{RSM}}$ : Reference Sector Method. b)  $T_{\text{ALC}}$ : Absolute Limb Correction. c)  $T_{\text{RLC}}$ : Relative Limb Correction.

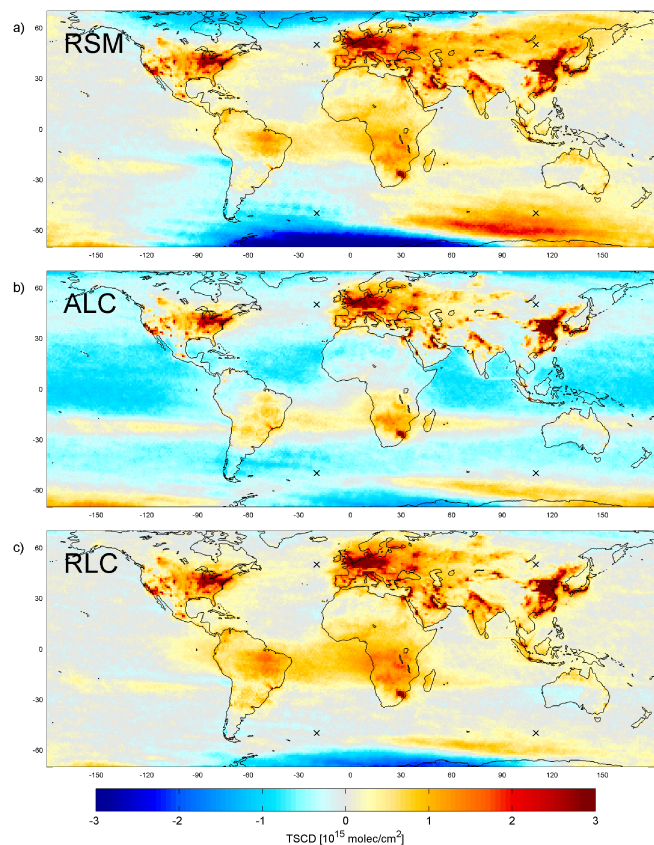

**Fig. S15.** Mean tropospheric SCDs for October 2003-2008. a)  $T_{\text{RSM}}$ : Reference Sector Method. b)  $T_{\text{ALC}}$ : Absolute Limb Correction. c)  $T_{\text{RLC}}$ : Relative Limb Correction.

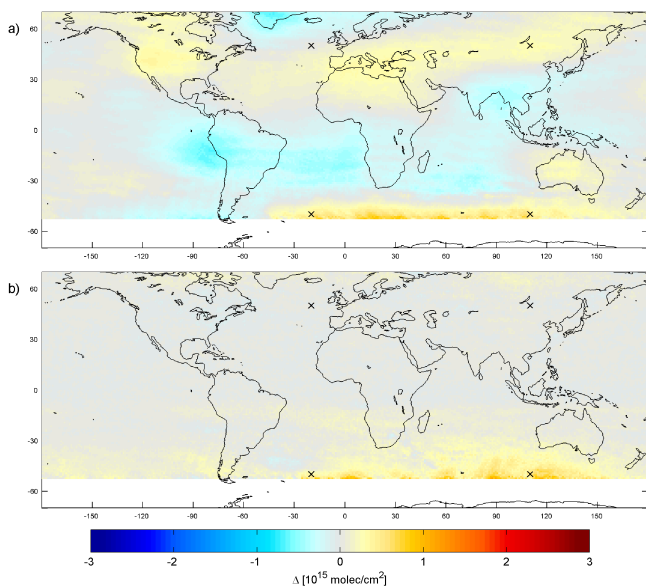

**Fig. S14.** Difference of RSM and RLC for July 2003-2008. a) Difference of mean tropospheric SCDs  $T_{\text{RSM}} - T_{\text{RLC}}$ . b) Difference of standard deviations:  $s(T_{\text{RSM}}) - s(T_{\text{RLC}})$ .

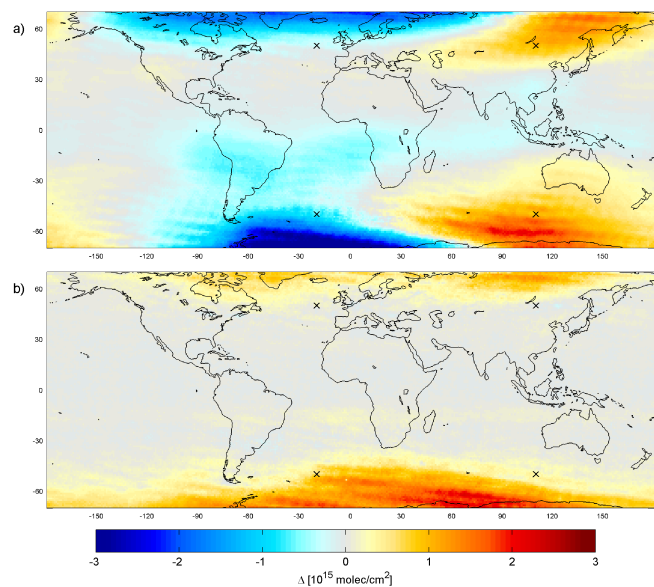

**Fig. S16.** Difference of RSM and RLC for October 2003-2008. a) Difference of mean tropospheric SCDs  $T_{\text{RSM}} - T_{\text{RLC}}$ . b) Difference of standard deviations:  $s(T_{\text{RSM}}) - s(T_{\text{RLC}})$ .
